# Supplementary material for: In Vitro Antioxidant Activities of the Aqueous and Methanolic Stem Bark Extracts of Piliostigma thonningii (Schum.)
Source: PubMed Central journal article supplement — J Evid Based Integr Med. 2020 Jul 14;25:2515690X20937988. doi: 10.1177/2515690X20937988 (PMC7364801; doi:10.1177/2515690x20937988), 2020-07-14
Supplement: JEBIM_Additional_File_for_P-values.pdf [file JEBIM_Additional_File_for_P-values.pdf]

## TABLE OF p-VALUES

### 1. *In vitro* inhibition of lipid peroxidation

#### a. Tukey Pairwise Comparisons (The aqueous stem bark extract of *P. thonningii* versus concentration (µg/ml))

##### Tukey Simultaneous Tests for Differences of Means

| Difference of Levels | Difference of Means | 95% CI          | T-Value | Adjusted P-Value |
|----------------------|---------------------|-----------------|---------|------------------|
| 100 - 50             | 0.366               | (-0.433, 1.165) | 1.47    | 0.498            |
| 150 - 50             | 0.993               | (0.194, 1.793)  | 3.98    | 0.017            |
| 200 - 50             | 4.007               | (3.207, 4.806)  | 16.05   | 0.000            |
| 150 - 100            | 0.627               | (-0.172, 1.427) | 2.51    | 0.132            |
| 200 - 100            | 3.641               | (2.841, 4.440)  | 14.59   | 0.000            |
| 200 - 150            | 3.013               | (2.214, 3.813)  | 12.07   | 0.000            |

*Individual confidence level = 98.74%*

#### b. Tukey Pairwise Comparisons (The methanolic stem bark extract of *P. thonningii* versus concentration (µg/ml))

##### Tukey Simultaneous Tests for Differences of Means

| Difference of Levels | Difference of Means | 95% CI          | T-Value | Adjusted P-Value |
|----------------------|---------------------|-----------------|---------|------------------|
| 100 - 50             | 18.22               | (7.41, 29.02)   | 5.40    | 0.003            |
| 150 - 50             | 18.64               | (7.84, 29.45)   | 5.53    | 0.002            |
| 200 - 50             | 40.18               | (29.37, 50.98)  | 11.91   | 0.000            |
| 150 - 100            | 0.42                | (-10.38, 11.23) | 0.13    | 0.999            |
| 200 - 100            | 21.96               | (11.15, 32.76)  | 6.51    | 0.001            |
| 200 - 150            | 21.53               | (10.73, 32.34)  | 6.38    | 0.001            |

*Individual confidence level = 98.74%*

#### c. Tukey Pairwise Comparisons (Standard: L-Ascorbic Acid versus concentration (µg/ml))

##### Tukey Simultaneous Tests for Differences of Means

| Difference of Levels | Difference of Means | 95% CI           | T-Value | Adjusted P-Value |
|----------------------|---------------------|------------------|---------|------------------|
| 100 - 50             | 3.147               | (1.587, 4.707)   | 6.46    | 0.001            |
| 150 - 50             | 5.634               | (4.074, 7.194)   | 11.57   | 0.000            |
| 200 - 50             | 14.575              | (13.015, 16.135) | 29.93   | 0.000            |
| 150 - 100            | 2.487               | (0.927, 4.047)   | 5.11    | 0.004            |
| 200 - 100            | 11.428              | (9.868, 12.988)  | 23.47   | 0.000            |
| 200 - 150            | 8.941               | (7.381, 10.501)  | 18.36   | 0.000            |

*Individual confidence level = 98.74%*

**d. Tukey Pairwise Comparisons at the tested concentrations**

**i. At 50 µg/ml concentration level**

**Tukey Simultaneous Tests for Differences of Means**

| <b>Difference of Levels</b> | <b>Difference of Means</b> | <b>95% CI</b>      | <b>T-Value</b> | <b>Adjusted P-Value</b> |
|-----------------------------|----------------------------|--------------------|----------------|-------------------------|
| PTM - L-ASA                 | -24.919                    | (-26.415, -23.423) | -51.11         | 0.000                   |
| PTW - L-ASA                 | 21.529                     | (20.033, 23.026)   | 44.16          | 0.000                   |
| PTW - PTM                   | 46.448                     | (44.952, 47.944)   | 95.27          | 0.000                   |

*Individual confidence level = 97.80%*

Key: L-ASA=L-Ascorbic Acid; PTW= Aqueous stem bark extract of *P. thonningii*;  
PTM= Methanolic stem bark extract of *P. thonningii*

**ii. At 100 µg/ml concentration level**

**Tukey Simultaneous Tests for Differences of Means**

| <b>Difference of Levels</b> | <b>Difference of Means</b> | <b>95% CI</b>   | <b>T-Value</b> | <b>Adjusted P-Value</b> |
|-----------------------------|----------------------------|-----------------|----------------|-------------------------|
| PTM - L-ASA                 | -9.85                      | (-15.52, -4.17) | -5.32          | 0.004                   |
| PTW - L-ASA                 | 18.75                      | (13.07, 24.42)  | 10.14          | 0.000                   |
| PTW - PTM                   | 28.59                      | (22.92, 34.27)  | 15.46          | 0.000                   |

*Individual confidence level = 97.80%*

Key: L-ASA=L-Ascorbic Acid; PTW= Aqueous stem bark extract of *P. thonningii*;  
PTM= Methanolic stem bark extract of *P. thonningii*

**iii. At 150 µg/ml concentration level**

**Tukey Simultaneous Tests for Differences of Means**

| <b>Difference of Levels</b> | <b>Difference of Means</b> | <b>95% CI</b>     | <b>T-Value</b> | <b>Adjusted P-Value</b> |
|-----------------------------|----------------------------|-------------------|----------------|-------------------------|
| PTM - L-ASA                 | -11.909                    | (-14.339, -9.480) | -15.04         | 0.000                   |
| PTW - L-ASA                 | 16.889                     | (14.459, 19.318)  | 21.33          | 0.000                   |
| PTW - PTM                   | 28.798                     | (26.369, 31.228)  | 36.38          | 0.000                   |

*Individual confidence level = 97.80%*

Key: L-ASA=L-Ascorbic Acid; PTW= Aqueous stem bark extract of *P. thonningii*;  
PTM= Methanolic stem bark extract of *P. thonningii*

iv. At 200 µg/ml concentration level

**Tukey Simultaneous Tests for Differences of Means**

| Difference of Levels | Difference of Means | 95% CI         | T-Value | Adjusted P-Value |
|----------------------|---------------------|----------------|---------|------------------|
| PTM - L-ASA          | 0.68                | (-9.63, 10.99) | 0.20    | 0.978            |
| PTW - L-ASA          | 10.96               | (0.65, 21.27)  | 3.26    | 0.039            |
| PTW - PTM            | 10.28               | (-0.03, 20.59) | 3.06    | 0.051            |

Individual confidence level = 97.80%

Key: L-ASA=L-Ascorbic Acid; PTW= Aqueous stem bark extract of *P. thonningii*; PTM= Methanolic stem bark extract of *P. thonningii*

**2. In vitro DPPH radical scavenging activities**

**a. Tukey Pairwise Comparisons (The aqueous stem bark extract of *P. thonningii* versus concentration (µg/ml))**

**Tukey Simultaneous Tests for Differences of Means**

| Difference of Levels | Difference of Means | 95% CI         | T-Value | Adjusted P-Value |
|----------------------|---------------------|----------------|---------|------------------|
| 0.10 - 0.01          | 1.47                | (-6.30, 9.23)  | 0.63    | 0.986            |
| 1.00 - 0.01          | 3.33                | (-4.43, 11.09) | 1.44    | 0.704            |
| 10.00 - 0.01         | 5.96                | (-1.80, 13.73) | 2.58    | 0.176            |
| 100.00 - 0.01        | 17.00               | (9.24, 24.76)  | 7.35    | 0.000            |
| 1000.00 - 0.01       | 24.67               | (16.91, 32.44) | 10.67   | 0.000            |
| 1.00 - 0.10          | 1.86                | (-5.90, 9.63)  | 0.81    | 0.961            |
| 10.00 - 0.10         | 4.50                | (-3.27, 12.26) | 1.95    | 0.423            |
| 100.00 - 0.10        | 15.53               | (7.77, 23.30)  | 6.72    | 0.000            |
| 1000.00 - 0.10       | 23.21               | (15.44, 30.97) | 10.04   | 0.000            |
| 10.00 - 1.00         | 2.63                | (-5.13, 10.40) | 1.14    | 0.856            |
| 100.00 - 1.00        | 13.67               | (5.91, 21.43)  | 5.91    | 0.001            |
| 1000.00 - 1.00       | 21.34               | (13.58, 29.11) | 9.23    | 0.000            |
| 100.00 - 10.00       | 11.04               | (3.27, 18.80)  | 4.77    | 0.005            |
| 1000.00 - 10.00      | 18.71               | (10.95, 26.47) | 8.09    | 0.000            |
| 1000.00 - 100.00     | 7.67                | (-0.09, 15.44) | 3.32    | 0.053            |

Individual confidence level = 99.43%

**b. Tukey Pairwise Comparisons (The methanolic stem bark extract of *P. thonningii* versus concentration (µg/ml))**

**Tukey Simultaneous Tests for Differences of Means**

| Difference of Levels | Difference of Means | 95% CI         | T-Value | Adjusted P-Value |
|----------------------|---------------------|----------------|---------|------------------|
| 0.10 - 0.01          | 2.63                | (-0.95, 6.22)  | 2.47    | 0.208            |
| 1.00 - 0.01          | 7.23                | (3.64, 10.81)  | 6.77    | 0.000            |
| 10.00 - 0.01         | 45.84               | (42.26, 49.42) | 42.96   | 0.000            |
| 100.00 - 0.01        | 48.20               | (44.61, 51.78) | 45.17   | 0.000            |
| 1000.00 - 0.01       | 48.36               | (44.78, 51.95) | 45.33   | 0.000            |

|                  |       |                |       |       |
|------------------|-------|----------------|-------|-------|
| 1.00 - 0.10      | 4.59  | (1.01, 8.18)   | 4.30  | 0.010 |
| 10.00 - 0.10     | 43.21 | (39.62, 46.79) | 40.49 | 0.000 |
| 100.00 - 0.10    | 45.56 | (41.98, 49.15) | 42.70 | 0.000 |
| 1000.00 - 0.10   | 45.73 | (42.15, 49.31) | 42.86 | 0.000 |
| 10.00 - 1.00     | 38.61 | (35.03, 42.20) | 36.19 | 0.000 |
| 100.00 - 1.00    | 40.97 | (37.39, 44.55) | 38.40 | 0.000 |
| 1000.00 - 1.00   | 41.14 | (37.55, 44.72) | 38.55 | 0.000 |
| 100.00 - 10.00   | 2.36  | (-1.23, 5.94)  | 2.21  | 0.301 |
| 1000.00 - 10.00  | 2.52  | (-1.06, 6.11)  | 2.36  | 0.242 |
| 1000.00 - 100.00 | 0.17  | (-3.42, 3.75)  | 0.16  | 1.000 |

*Individual confidence level = 99.43%*

**c. Tukey Pairwise Comparisons (Standard: L-Ascorbic Acid versus concentration ( $\mu\text{g/ml}$ ))**

**Tukey Simultaneous Tests for Differences of Means**

| <b>Difference of Levels</b> | <b>Difference of Means</b> | <b>95% CI</b>  | <b>T-Value</b> | <b>Adjusted P-Value</b> |
|-----------------------------|----------------------------|----------------|----------------|-------------------------|
| 0.10 - 0.01                 | 4.38                       | (-1.44, 10.20) | 2.53           | 0.191                   |
| 1.00 - 0.01                 | 12.44                      | (6.62, 18.26)  | 7.18           | 0.000                   |
| 10.00 - 0.01                | 31.90                      | (26.08, 37.72) | 18.41          | 0.000                   |
| 100.00 - 0.01               | 31.97                      | (26.15, 37.79) | 18.45          | 0.000                   |
| 1000.00 - 0.01              | 31.97                      | (26.15, 37.79) | 18.45          | 0.000                   |
| 1.00 - 0.10                 | 8.07                       | (2.25, 13.89)  | 4.66           | 0.006                   |
| 10.00 - 0.10                | 27.52                      | (21.70, 33.34) | 15.89          | 0.000                   |
| 100.00 - 0.10               | 27.59                      | (21.77, 33.41) | 15.93          | 0.000                   |
| 1000.00 - 0.10              | 27.59                      | (21.77, 33.41) | 15.93          | 0.000                   |
| 10.00 - 1.00                | 19.46                      | (13.64, 25.28) | 11.23          | 0.000                   |
| 100.00 - 1.00               | 19.53                      | (13.71, 25.35) | 11.27          | 0.000                   |
| 1000.00 - 1.00              | 19.53                      | (13.71, 25.35) | 11.27          | 0.000                   |
| 100.00 - 10.00              | 0.07                       | (-5.75, 5.89)  | 0.04           | 1.000                   |
| 1000.00 - 10.00             | 0.07                       | (-5.75, 5.89)  | 0.04           | 1.000                   |
| 1000.00 - 100.00            | 0.00                       | (-5.82, 5.82)  | 0.00           | 1.000                   |

*Individual confidence level = 99.43%*

**d. Tukey Pairwise Comparisons at the tested concentrations**

**i. At 0.01  $\mu\text{g/ml}$  concentration level**

**Tukey Simultaneous Tests for Differences of Means**

| <b>Difference of Levels</b> | <b>Difference of Means</b> | <b>95% CI</b>    | <b>T-Value</b> | <b>Adjusted P-Value</b> |
|-----------------------------|----------------------------|------------------|----------------|-------------------------|
| PTM - L-ASA                 | -17.68                     | (-23.58, -11.78) | -9.20          | 0.000                   |
| PTW - L-ASA                 | -0.83                      | (-6.73, 5.06)    | -0.43          | 0.903                   |
| PTW - PTM                   | 16.85                      | (10.95, 22.74)   | 8.77           | 0.000                   |

*Individual confidence level = 97.80%*

Key: L-ASA=L-Ascorbic Acid; PTW= Aqueous stem bark extract of *P. thonningii*;  
PTM= Methanolic stem bark extract of *P. thonningii*

**ii. At 0.1  $\mu\text{g/ml}$  concentration level**

### Tukey Simultaneous Tests for Differences of Means

| Difference of Levels | Difference of Means | 95% CI           | T-Value | Adjusted P-Value |
|----------------------|---------------------|------------------|---------|------------------|
| PTM - L-ASA          | -19.42              | (-24.72, -14.13) | -11.26  | 0.000            |
| PTW - L-ASA          | -3.74               | (-9.04, 1.55)    | -2.17   | 0.155            |
| PTW - PTM            | 15.68               | (10.39, 20.97)   | 9.09    | 0.000            |

Individual confidence level = 97.80%

Key: L-ASA=L-Ascorbic Acid; PTW= Aqueous stem bark extract of *P. thonningii*;  
PTM= Methanolic stem bark extract of *P. thonningii*

#### iii. At 1 µg/ml concentration level

### Tukey Simultaneous Tests for Differences of Means

| Difference of Levels | Difference of Means | 95% CI           | T-Value | Adjusted P-Value |
|----------------------|---------------------|------------------|---------|------------------|
| PTM - L-ASA          | -22.90              | (-29.85, -15.94) | -10.11  | 0.000            |
| PTW - L-ASA          | -9.95               | (-16.90, -2.99)  | -4.39   | 0.011            |
| PTW - PTM            | 12.95               | (6.00, 19.90)    | 5.72    | 0.003            |

Individual confidence level = 97.80%

Key: L-ASA=L-Ascorbic Acid; PTW= Aqueous stem bark extract of *P. thonningii*;  
PTM= Methanolic stem bark extract of *P. thonningii*

#### iv. At 10 µg/ml concentration level

### Tukey Simultaneous Tests for Differences of Means

| Difference of Levels | Difference of Means | 95% CI             | T-Value | Adjusted P-Value |
|----------------------|---------------------|--------------------|---------|------------------|
| PTM - L-ASA          | -3.740              | (-5.813, -1.667)   | -5.54   | 0.004            |
| PTW - L-ASA          | -26.770             | (-28.843, -24.697) | -39.63  | 0.000            |
| PTW - PTM            | -23.030             | (-25.103, -20.957) | -34.09  | 0.000            |

Individual confidence level = 97.80%

Key: L-ASA=L-Ascorbic Acid; PTW= Aqueous stem bark extract of *P. thonningii*;  
PTM= Methanolic stem bark extract of *P. thonningii*

#### v. At 100 µg/ml concentration level

### Tukey Simultaneous Tests for Differences of Means

| Difference of Levels | Difference of Means | 95% CI          | T-Value | Adjusted P-Value |
|----------------------|---------------------|-----------------|---------|------------------|
| PTM - L-ASA          | -1.45               | (-9.30, 6.40)   | -0.57   | 0.841            |
| PTW - L-ASA          | -15.80              | (-23.65, -7.95) | -6.18   | 0.002            |
| PTW - PTM            | -14.35              | (-22.20, -6.50) | -5.61   | 0.003            |

Individual confidence level = 97.80%

Key: L-ASA=L-Ascorbic Acid; PTW= Aqueous stem bark extract of *P. thonningii*;  
PTM= Methanolic stem bark extract of *P. thonningii*

**vi. At 1000 µg/ml concentration level**

**Tukey Simultaneous Tests for Differences of Means**

| Difference of Levels | Difference of Means | 95% CI           | T-Value | Adjusted P-Value |
|----------------------|---------------------|------------------|---------|------------------|
| PTM - L-ASA          | -1.287              | (-2.556, -0.017) | -3.11   | 0.048            |
| PTW - L-ASA          | -8.130              | (-9.400, -6.860) | -19.65  | 0.000            |
| PTW - PTM            | -6.843              | (-8.113, -5.574) | -16.54  | 0.000            |

*Individual confidence level = 97.80%*

Key: L-ASA=L-Ascorbic Acid; PTW= Aqueous stem bark extract of *P. thonningii*;  
PTM= Methanolic stem bark extract of *P. thonningii*

**3. In vitro Ferric Reducing Antioxidant Power (PFRAP) activities**

**a. Tukey Pairwise Comparisons (The aqueous stem bark extract of *P. thonningii* versus concentration (µg/ml))**

**Tukey Simultaneous Tests for Differences of Means**

| Difference of Levels | Difference of Means | 95% CI            | T-Value | Adjusted P-Value |
|----------------------|---------------------|-------------------|---------|------------------|
| 100 - 50             | 0.1127              | (-0.0877, 0.3130) | 1.80    | 0.339            |
| 150 - 50             | 0.1753              | (-0.0250, 0.3757) | 2.80    | 0.088            |
| 200 - 50             | 0.2777              | (0.0773, 0.4780)  | 4.44    | 0.009            |
| 150 - 100            | 0.0627              | (-0.1377, 0.2630) | 1.00    | 0.753            |
| 200 - 100            | 0.1650              | (-0.0353, 0.3653) | 2.64    | 0.111            |
| 200 - 150            | 0.1023              | (-0.0980, 0.3027) | 1.64    | 0.413            |

*Individual confidence level = 98.74%*

**b. Tukey Pairwise Comparisons (The methanolic stem bark extract of *P. thonningii* versus concentration (µg/ml))**

**Tukey Simultaneous Tests for Differences of Means**

| Difference of Levels | Difference of Means | 95% CI            | T-Value | Adjusted P-Value |
|----------------------|---------------------|-------------------|---------|------------------|
| 100 - 50             | 0.1320              | (-0.1194, 0.3834) | 1.68    | 0.391            |
| 150 - 50             | 0.2837              | (0.0322, 0.5351)  | 3.61    | 0.028            |
| 200 - 50             | 0.3050              | (0.0536, 0.5564)  | 3.89    | 0.019            |
| 150 - 100            | 0.1517              | (-0.0998, 0.4031) | 1.93    | 0.288            |
| 200 - 100            | 0.1730              | (-0.0784, 0.4244) | 2.20    | 0.202            |
| 200 - 150            | 0.0213              | (-0.2301, 0.2728) | 0.27    | 0.992            |

*Individual confidence level = 98.74%*

**c. Tukey Pairwise Comparisons (Standard: L-Ascorbic Acid versus concentration (µg/ml))**

### Tukey Simultaneous Tests for Differences of Means

| Difference of Levels | Difference of Means | 95% CI            | T-Value | Adjusted P-Value |
|----------------------|---------------------|-------------------|---------|------------------|
| 100 - 50             | 0.0590              | (-0.0436, 0.1616) | 1.84    | 0.323            |
| 150 - 50             | 0.0977              | (-0.0050, 0.2003) | 3.05    | 0.062            |
| 200 - 50             | 0.1680              | (0.0654, 0.2706)  | 5.24    | 0.003            |
| 150 - 100            | 0.0387              | (-0.0640, 0.1413) | 1.21    | 0.640            |
| 200 - 100            | 0.1090              | (0.0064, 0.2116)  | 3.40    | 0.038            |
| 200 - 150            | 0.0703              | (-0.0323, 0.1730) | 2.19    | 0.204            |

Individual confidence level = 98.74%

#### d. Tukey Pairwise Comparisons at the tested concentrations

##### i. At 50 µg/ml concentration level

### Tukey Simultaneous Tests for Differences of Means

| Difference of Levels | Difference of Means | 95% CI            | T-Value | Adjusted P-Value |
|----------------------|---------------------|-------------------|---------|------------------|
| PTM - L-ASA          | -0.0637             | (-0.3181, 0.1908) | -0.77   | 0.735            |
| PTW - L-ASA          | 0.3187              | (0.0642, 0.5731)  | 3.84    | 0.020            |
| PTW - PTM            | 0.3823              | (0.1279, 0.6368)  | 4.61    | 0.009            |

Individual confidence level = 97.80%

Key: L-ASA=L-Ascorbic Acid; PTW= Aqueous stem bark extract of *P. thonningii*;  
PTM= Methanolic stem bark extract of *P. thonningii*

##### ii. At 100 µg/ml concentration level

### Tukey Simultaneous Tests for Differences of Means

| Difference of Levels | Difference of Means | 95% CI            | T-Value | Adjusted P-Value |
|----------------------|---------------------|-------------------|---------|------------------|
| PTM - L-ASA          | 0.0093              | (-0.1605, 0.1792) | 0.17    | 0.984            |
| PTW - L-ASA          | 0.3723              | (0.2025, 0.5422)  | 6.73    | 0.001            |
| PTW - PTM            | 0.3630              | (0.1931, 0.5329)  | 6.56    | 0.001            |

Individual confidence level = 97.80%

Key: L-ASA=L-Ascorbic Acid; PTW= Aqueous stem bark extract of *P. thonningii*;  
PTM= Methanolic stem bark extract of *P. thonningii*

##### iii. At 150 µg/ml concentration level

### Tukey Simultaneous Tests for Differences of Means

| Difference of Levels | Difference of Means | 95% CI            | T-Value | Adjusted P-Value |
|----------------------|---------------------|-------------------|---------|------------------|
| PTM - L-ASA          | 0.1223              | (-0.0572, 0.3019) | 2.09    | 0.172            |
| PTW - L-ASA          | 0.3963              | (0.2168, 0.5759)  | 6.77    | 0.001            |
| PTW - PTM            | 0.2740              | (0.0944, 0.4536)  | 4.68    | 0.008            |

Individual confidence level = 97.80%

Key: L-ASA= L-Ascorbic Acid; PTW= Aqueous stem bark extract of *P. thonningii*;  
PTM= Methanolic stem bark extract of *P. thonningii*

**iv. At 200 µg/ml concentration level**

**Tukey Simultaneous Tests for Differences of Means**

| <b>Difference<br/>of Levels</b> | <b>Difference<br/>of Means</b> | <b>95% CI</b>     | <b>T-Value</b> | <b>Adjusted<br/>P-Value</b> |
|---------------------------------|--------------------------------|-------------------|----------------|-----------------------------|
| PTM - L-ASA                     | 0.0733                         | (-0.0430, 0.1897) | 1.93           | 0.210                       |
| PTW - L-ASA                     | 0.4283                         | (0.3120, 0.5447)  | 11.30          | 0.000                       |
| PTW - PTM                       | 0.3550                         | (0.2386, 0.4714)  | 9.36           | 0.000                       |

*Individual confidence level = 97.80%*

Key: L-ASA= L-Ascorbic Acid; PTW= Aqueous stem bark extract of *P. thonningii*;  
PTM= Methanolic stem bark extract of *P. thonningii*
